# Supplementary material
Source: MDPI journal article supplement (https://www.mdpi.com/2673-5318/4/1/6)
Supplement: s1 [file s1]

## Supplementary Material

### The Destiny Evaluation Questionnaire (English translation)

Name of character: \_\_\_\_\_ Ethnicity: \_\_\_\_\_ Dynasty: \_\_\_\_\_  
Family socioeconomic status: \_\_\_\_\_ Education level: \_\_\_\_\_ Career: \_\_\_\_\_  
Evaluating date: \_\_\_\_\_

**A. Career Achievement** (For each character, score one of A1, A2 or A3 group only according to his/ her career, and later continue to score A4.)

#### A1. Politics and Military

- A1P1. Official position: 1 (None), 2 (Low-rank, such as local officials), ..., 7 (Very high rank, such as emperor/ president)
- A1P2. Achievement/ standings: 1 (None), ..., 7 (Major achievements)
- A1P3. Impact (power and influence): 1 (Weak), ..., 7 (Tremendous)

#### A2. Techno-culture

- A2T1 Number of works: 1 (None), 2 (Few), ..., 7 (Many)
- A2T2. Influence of works: 1 (Little), ..., 7 (Many important masterpieces)
- A2T3. Awards/ titles: 1 (None), ..., 7 (Many important awards)

#### A3. Economy

- A3E1. Business broadness: 1 (Single industry), ..., 7 (Many industries)
- A3E2. Industrial career duration: 1 (Very short), ..., 7 (Very long, such as of one century)
- A3E3. Economic influence: 1 (Little), ..., 7 (Great, such as influencing domestic or international economy)

#### A4. General (for each character)

- A4G4. Social influence (Outside career): 1 (Little), ..., 7 (Great)
- A4G5. Social reputation: 1 (Very bad), ..., 7 (Excellent)
- A4G6. Evaluation on character's achievements by later generations: 1 (Very low), ..., 7 (Very high)
- A4G7. Character's evaluation on self-achievements: 1 (Unsatisfied), ..., 7 (Very satisfied)
- A4G8. Evaluation on character's achievements by contemporaries of his/ her age: 1 (Very low), ..., 7 (Very high)
- A4G9. Occupational position in society: 1 (Very low), ..., 7 (Very high)
- A4G10. Properties owned by character: 1 (Small amount), ..., 7 (Huge amount)

## B. Health and Longevity

Refer to the following for an overall score: 1 (Unhealthy, early deceased), ..., 7 (Healthy and longevous)

B1. Cause of death: 1 (due to murder), 2 (forced suicidal), 3 (suicidal), 4 (by criminal penalty), 5 (accidental), 6 (due to illness), 7 (natural)

B2. Illness: 1 (seriously/ critically ill), 2 (chronically ill), ..., 7 (healthy)

B3. Lifespan: 1 (less than 30 yrs.), 2 (30 ~ 39), 3 (40 ~ 49), 4 (50 ~ 59), 5 (60 ~ 69), 6 (70 ~ 79), 7 (over 80)

**C. Marriage and Family** (if the character was not married, please specify and only answer questions C4 and C5)

C1. Evaluation on character by others (spouse/ children/ friends): 1 (Very low), ..., 7 (Very high)

C2. Relationship with family members (spouse/ children/ parents; for family conflicts): 1 (Very bad), ..., 7 (Harmonious)

C3. Marital stability (number of wives/ marriages) and fidelity (number of sexual partners/ lovers); 1 (Very low), ..., 7 (Very high)

C4. Character's own/ others' evaluation on his/ her appearance: 1 (Ugly/ messy), ..., 7 (Appearance-splendid)

C5. Source of economic income: 1 (Mainly black income), ..., 7 (Legitimate income)

**D. Social Relationship**

Refer to the following for an overall score: 1 (Very bad), ..., 7 (Excellent)

D1. Acquaintance (friends): 1 (limited to one field), ..., 7 (from different fields and classes)

D2. Evaluation by friends/ opponents: 1 (contemptuous and ruinous), ..., 7 (respectful)

D3. Number of friends: 1 (None), 2 (Few), ..., 7 (Many)

## 命运评价表 (Chinese Version)

评价人物: \_\_\_\_\_ 民族: \_\_\_\_\_ 朝代: \_\_\_\_\_  
家庭背景: \_\_\_\_\_ 受教育程度: \_\_\_\_\_ 职业: \_\_\_\_\_  
评价时间: \_\_\_\_\_

### A 职业成就 (仅根据每位人物所处领域完成 A1, A2 或 A3 题组之一, 然后接着完成 A4 题组)

#### A1 政治军事

- A1P1. 官职: 1 (无官), 2 (低位, 如地方官), ..., 7 (位高权重, 如皇帝/ 总统)  
A1P2. 政绩/ 战绩: 1 (无), ..., 7 (多项重大功绩)  
A1P3. 影响力 (权势): 1 (很小), ..., 7 (很大)

#### A2 科技文化

- A2T1. 作品数量: 1 (无), 2 (很少), ..., 7 (很多)  
A2T2. 作品影响力: 1 (很小), ..., 7 (多部重要代表作)  
A2T3. 获得奖项/称号: 1 (无), ..., 7 (多项重要奖项)

#### A3 经济

- A3E1. 经营涉及范围: 1 (单一产业), ..., 7 (多产业)  
A3E2. 产业持续时间: 1 (很短), ..., 7 (很久, 如百年历史)  
A3E3. 经济影响力: 1 (很小), ..., 7 (很大, 如影响国内、国际经济局势)

#### A4 总体情况 (用于所有人物)

- A4G4. 社会影响力 (职业外): 1 (很小), ..., 7 (很大)  
A4G5. 社会名声: 1 (很差), ..., 7 (很好)  
A4G6. 后人对其业绩评价: 1 (很低), ..., 7 (很高)  
A4G7. 本人对其业绩评价: 1 (不满), ..., 7 (很满意)  
A4G8. 同时代人对其业绩评价: 1 (很低), ..., 7 (很高)  
A4G9. 所从事职业在社会上的地位: 1 (低贱), ..., 7 (很高)  
A4G10. 拥有财产: 1 (很少), ..., 7 (很多)

### B 健康寿命

- 参考以下方面总体给分: 1 (不健康, 早亡), ..., 7 (健康长寿)  
B1. 死亡原因: 1 (他杀), 2 (被迫自杀), 3 (自杀), 4 (刑罚致死), 5 (意外死亡), 6 (病死), 7 (自然死亡)  
B2. 疾病情况: 1 (患有危及生命的重病), 2 (常年抱病), ..., 7 (健康)  
B3. 寿命长短: 1 (30 岁以下), 2 (30 ~ 39), 3 (40 ~ 49), 4 (50 ~ 59), 5 (60 ~ 69), 6 (70 ~ 79), 7 (80 以上)

### C 婚姻家庭 (如果此人物没有结过婚, 请注明并只做 4、5 两题)

- C1. 他人 (配偶/ 子女/ 朋友) 对其评价: 1 (很低), ..., 7 (很高)  
C2. 与家人的关系 (配偶/ 子女/ 父母: 考虑吵架/冷战): 1 (很差), ..., 7 (和睦)  
C3. 婚姻稳定度 (正妻/ 婚姻数) 及忠诚度 (性伙伴/情人数量): 1 (很低), ..., 7 (很高)  
C4. 本人/ 他人对其外表的评价: 1 (丑陋/ 邋遢), ..., 7 (相貌堂堂)  
C5. 经济收入来源: 1 (黑色收入为主), ..., 7 (正当收入)

### D 社会关系

- 参考以下方面总体给分: 1 (很差), ..., 7 (很好)  
D1. 熟人 (朋友): 1 (仅限某一领域), ..., 7 (来自不同领域和阶层)  
D2. 好友/对手对其评价: 1 (轻视贬毁), ..., 7 (尊重)  
D3. 好友数量: 1 (无亲密好友), 2 (很少), ..., 7 (很多亲密好友)
